# Supplementary material
Source: PubMed Central journal article supplement (PMC7332464)
Supplement: mmc1.pdf [file mmc1.pdf]

## Supplemental Information

### Human-IgG-Neutralizing Monoclonal Antibodies

#### Block the SARS-CoV-2 Infection

Jinkai Wan, Shenghui Xing, Longfei Ding, Yongheng Wang, Chenjian Gu, Yanling Wu, Bowen Rong, Cheng Li, Siqing Wang, Kun Chen, Chenxi He, Dandan Zhu, Songhua Yuan, Chengli Qiu, Chen Zhao, Lei Nie, Zhangzhao Gao, Jingyu Jiao, Xiaoyan Zhang, Xiangxi Wang, Tianlei Ying, Haibin Wang, Youhua Xie, Yanan Lu, Jianqing Xu, and Fei Lan

## **Supplemental Information**

**Table S1. Summary of the numbers of obtained B cells and antibody clones from 11 convalescent patients. Related to Figure 1 and 2**

**Table S2. Summary of the characteristics and symptoms of the 11 COVID-19 patients. Related to Figure 1**

### **Figure S1. Related to Figure 1**

(A) Schematic depicting the screening strategy used to sort B cells from SARS-CoV-2 convalescent patients and antibody identification. (B) Flow cytometry B cell sorting from PBMCs of 10 convalescent patients (data of 505 sorting not shown).

### **Figure S2. Related to Figure 2**

(A) Summary of ELISA binding data of the selected SARS-CoV-2 specific monoclonal antibodies. (B) Flow cytometry analysis (FCA) of representative antibodies binding to SARS-CoV-2 S protein expressing on A549 cell membrane, 10 thousand cells in 100  $\mu$ l were incubated with antibodies 10nM. IgG-Fc-PE antibody was used as control. (C) Results of binding ELISA to SARS-CoV-2 Spike NTD.

### **Figure S3. Related to Figure 3**

(A) ACE2 binding to SARS-CoV-2 Spike protein expressed in A549 detected by flow cytometry. (B) ACE2 competition assay of the indicated antibodies using FCA. Indicated concentrations of antibodies were used to compete ACE2 binding to S protein expressed on A549 and HEK293T cell membrane. 10 thousand A549 cells in 100  $\mu$ l were used. (C) Mutagenesis analyses of the critical amino acid residues of RBD in mediating the interaction with the indicated antibodies. Interaction strengths were reflected by ELISA values

shown as the distances from the center, the closer to the center the more affected of the interaction by the mutation. (D) Structure views of 4 recently reported antibodies. Note, the RBD binding surfaces of all reported antibodies with structure information substantially overlap with the ACE2 binding surface.

**Figure S4. Related to Figure 4**

ACE2 binding to S proteins of SARS-CoV-2 and SARS-CoV expressed on HEK293T membrane. Non-transfected HEK293T were used as controls.

**Figure S5. Related to Figure 3**

Performance of the indicated neutralizing antibodies in the various assays.

**Table S1**

| <b>Donor</b> | <b>B cells counts</b> | <b>Clones</b> |
|--------------|-----------------------|---------------|
| 71           | 192                   | 16            |
| 105          | 192                   | 42            |
| 413          | 192                   | 35            |
| 414          | 192                   | 38            |
| 415          | 192                   | 22            |
| 501          | 192                   | 87            |
| 505          | 192                   | 74            |
| 509          | 192                   | 36            |
| 507          | 384                   | 146           |
| 515          | 192                   | 81            |
| 553          | 384                   | 152           |
| Total        | 2304                  | 729           |

**Table S1. Summary of the numbers of obtained B cells and antibody clones from 11 convalescent patients. Related to Figure 1 and 2**

**Table S2**

| Patient Information                         |                                             |                                                       |                           |                             |                                                |           |                                        |           |                                                 |           |                                       |
|---------------------------------------------|---------------------------------------------|-------------------------------------------------------|---------------------------|-----------------------------|------------------------------------------------|-----------|----------------------------------------|-----------|-------------------------------------------------|-----------|---------------------------------------|
| Patient number                              | 71                                          | 105                                                   | 413                       | 414                         | 415                                            | 501       | 505                                    | 507       | 509                                             | 515       | 553                                   |
| Gender                                      | Female                                      | Male                                                  | Female                    | Male                        | Female                                         | Male      | Female                                 | Male      | Male                                            | Female    | Male                                  |
| Age (years)                                 | 35                                          | 30                                                    | 48                        | 56                          | 65                                             | 29        | 60                                     | 15        | 54                                              | 59        | 40                                    |
| Sampling time point (after hospitalization) | 10 days                                     | 18 days                                               | 19 days                   | 16 days                     | 16 days                                        | 12 days   | 15 days                                | 9 days    | 1 days                                          | 9 days    | 25 days                               |
| Fever                                       | Yes                                         | Yes                                                   | Yes                       | Yes                         | No data                                        | No data   | Yes                                    | Yes       | No data                                         | Yes       | Yes (with myalgia)                    |
| Other information                           | Traveled in Shanghai from Wuhan at Jan 21st | Jan 13rd to 17th, spent time with a confirmed patient | Been to Wuhan at Jan 15th | Passed by Wuhan at Feb 23rd | Spent time with a low fever friend at Jan 19th | No data   | Passed by Wuhan at Jan 17th for 1 hour | No data   | Been close with a confirmed patient at Jan 14th | No data   | Been to Wuhan for working at Jan 11st |
| Admission time                              | 2020/1/27                                   | 2020/1/20                                             | 2020/1/26                 | 2020/1/29                   | 2020/1/29                                      | 2020/2/3  | 2020/1/31                              | 2020/2/6  | 2020/2/14                                       | 2020/2/6  | 2020/1/21                             |
| Discharge time                              | 2020/2/8                                    | 2020/2/8                                              | 2020/2/15                 | 2020/2/14                   | 2020/2/14                                      | 2020/2/15 | 2020/2/15                              | 2020/2/15 | 2020/2/29                                       | 2020/2/15 | 2020/2/15                             |

**Table S2. Summary of the characteristics and symptoms of the 11 COVID-19 patients. Related to Figure 1**

**Figure S1**

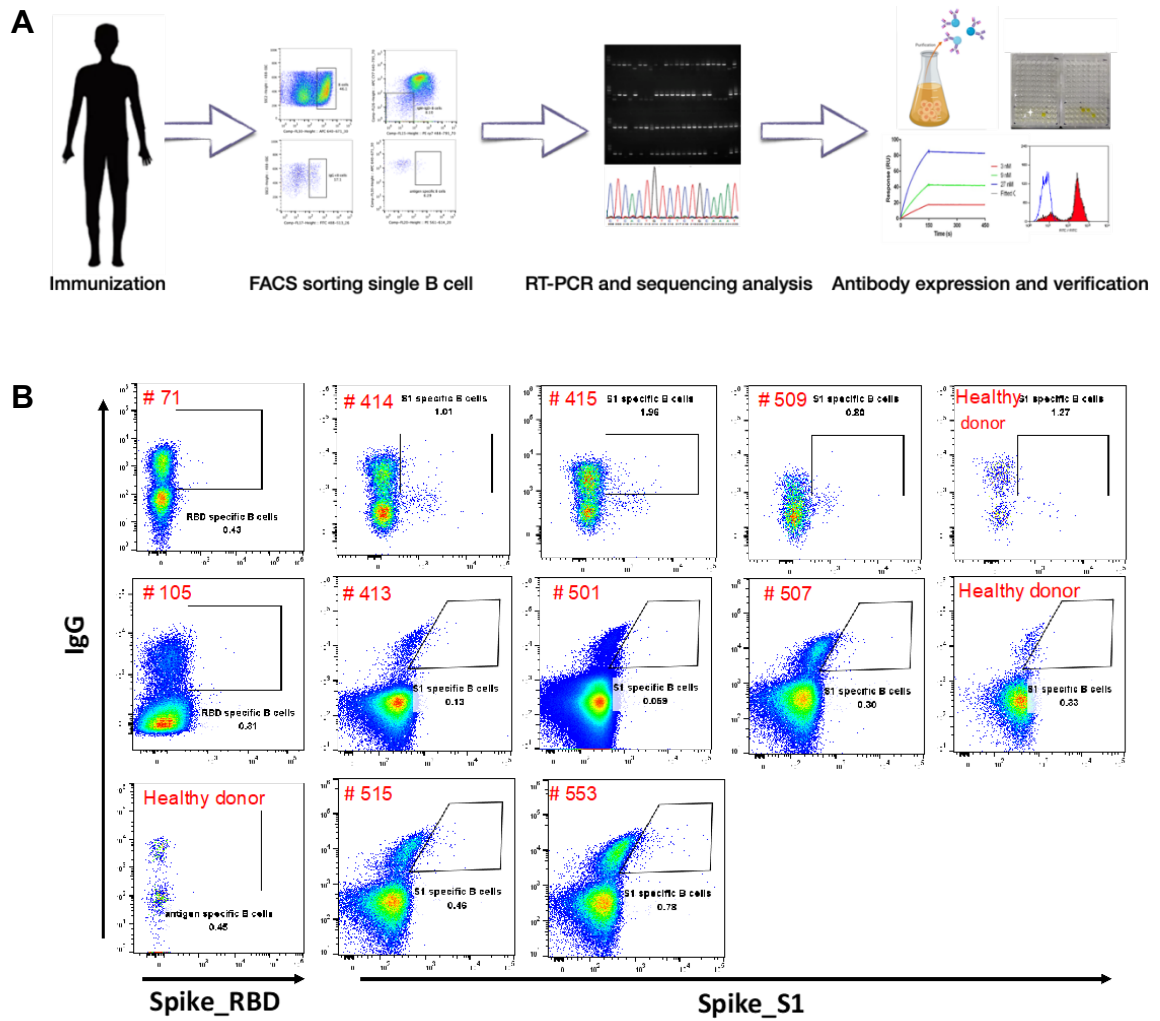

**Figure S1. Related to Figure 1**

(A) Schematic depicting the screening strategy used to sort B cells from SARS-CoV-2 convalescent patients and antibody identification. (B) Flow cytometry B cell sorting from PBMCs of 10 convalescent patients (data of 505 sorting not shown).

**Figure S2**

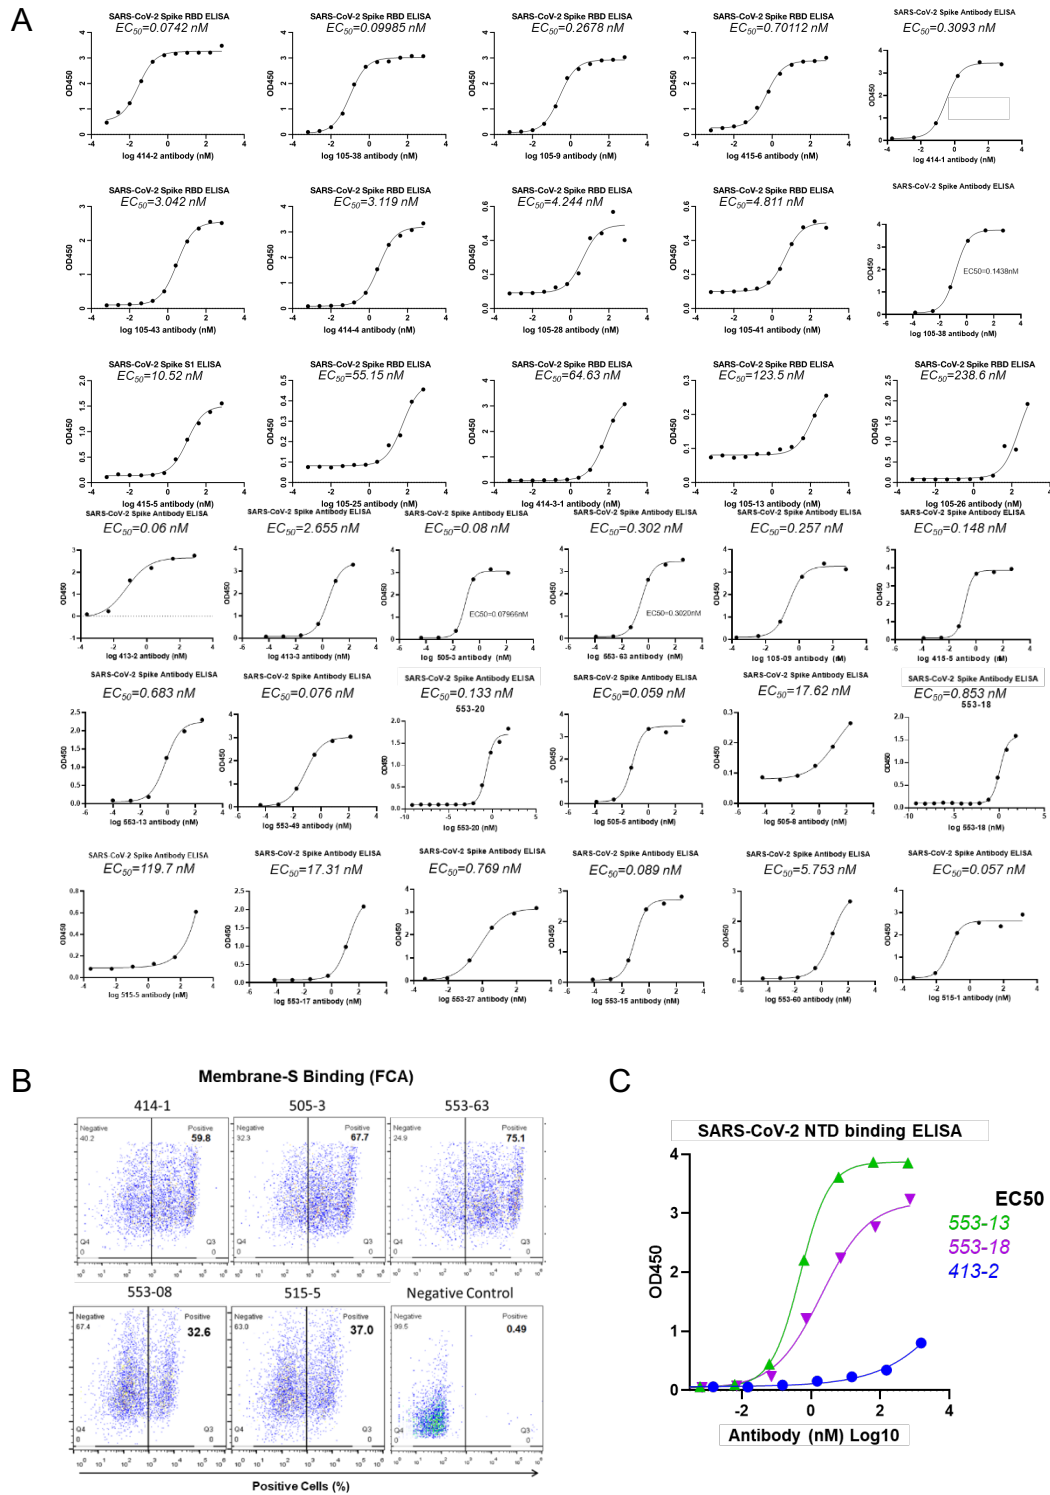

**Figure S2. Related to Figure 2**

(A) Summary of ELISA binding data of the selected SARS-CoV-2 specific monoclonal antibodies. (B) Flow cytometry analysis (FCA) of representative antibodies binding to SARS-CoV-2 S protein expressing on A549 cell membrane, 10 thousand cells in 100  $\mu$ l were incubated with antibodies 10nM. IgG-Fc-PE antibody was used as control. (C) Results of binding ELISA to SARS-CoV-2 Spike NTD.

**Figure S3**

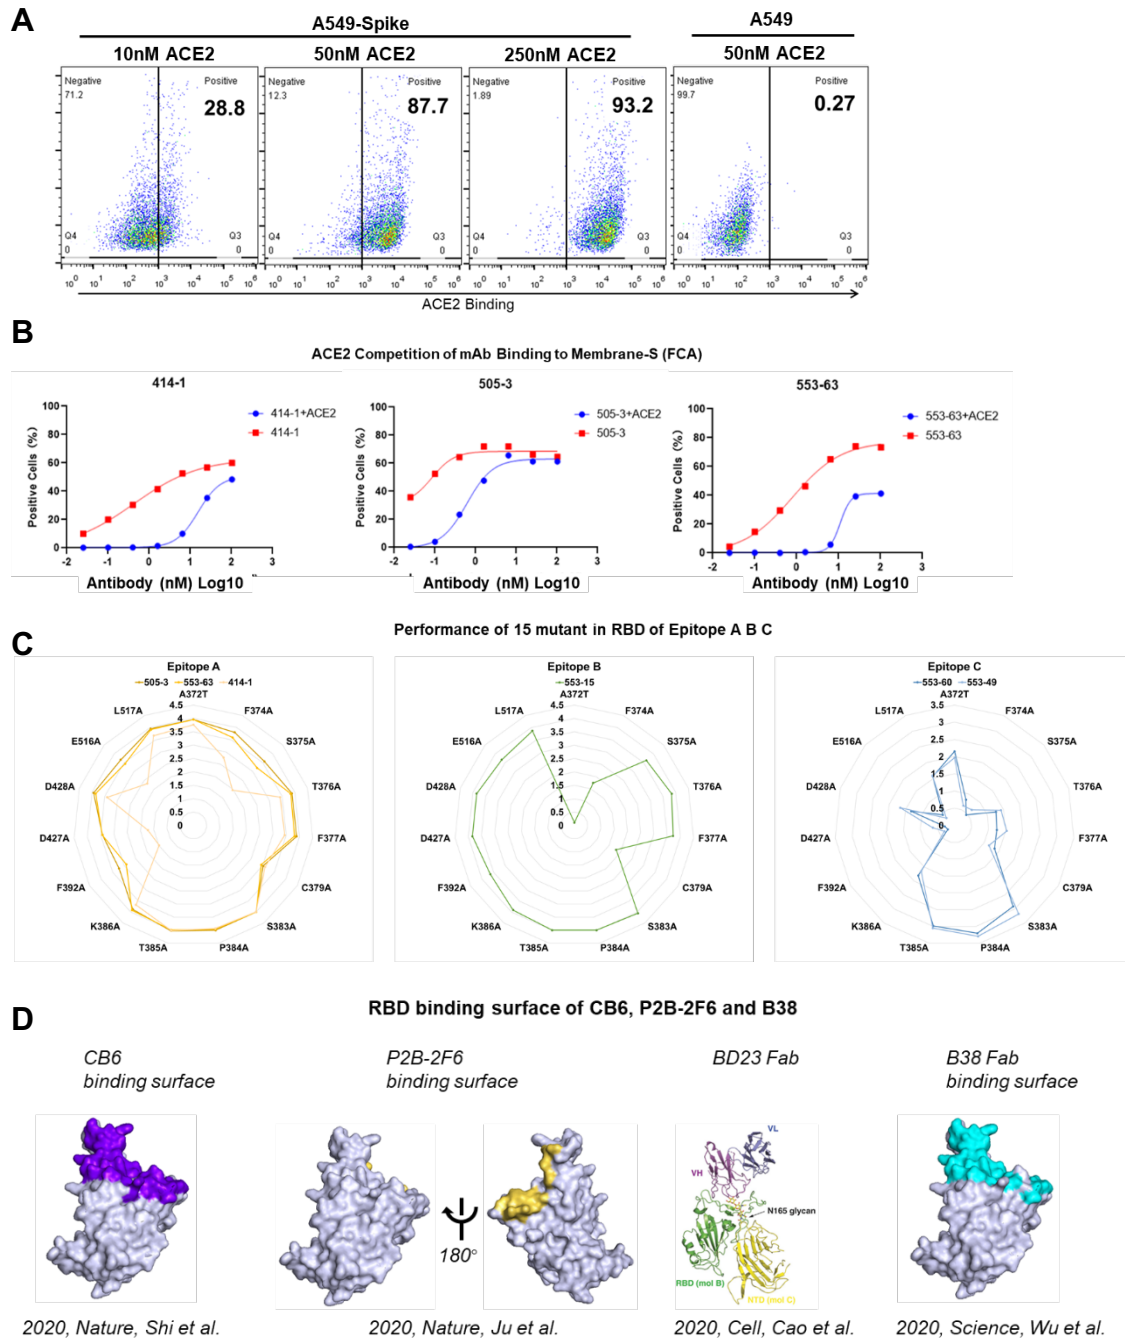

**Figure S3. Related to Figure 3**

(A) ACE2 binding to SARS-CoV-2 Spike protein expressed in A549 detected by flow cytometry. (B) ACE2 competition assay of the indicated antibodies using FCA. Indicated concentrations of antibodies were used to compete ACE2 binding to S protein expressed on A549 and HEK293T cell membrane. 10 thousand A549 cells in 100  $\mu$ l were used. (C) Mutagenesis analyses of the critical amino acid residues of RBD in mediating the interaction with the indicated antibodies. Interaction strengths were reflected by ELISA values shown as the distances from the center, the closer to the center the more affected of the interaction by the mutation. (D) Structure views of 4 recently reported antibodies. Note, the RBD binding surfaces of all reported antibodies with structure information substantially overlap with the ACE2 binding surface.



**Figure S4**

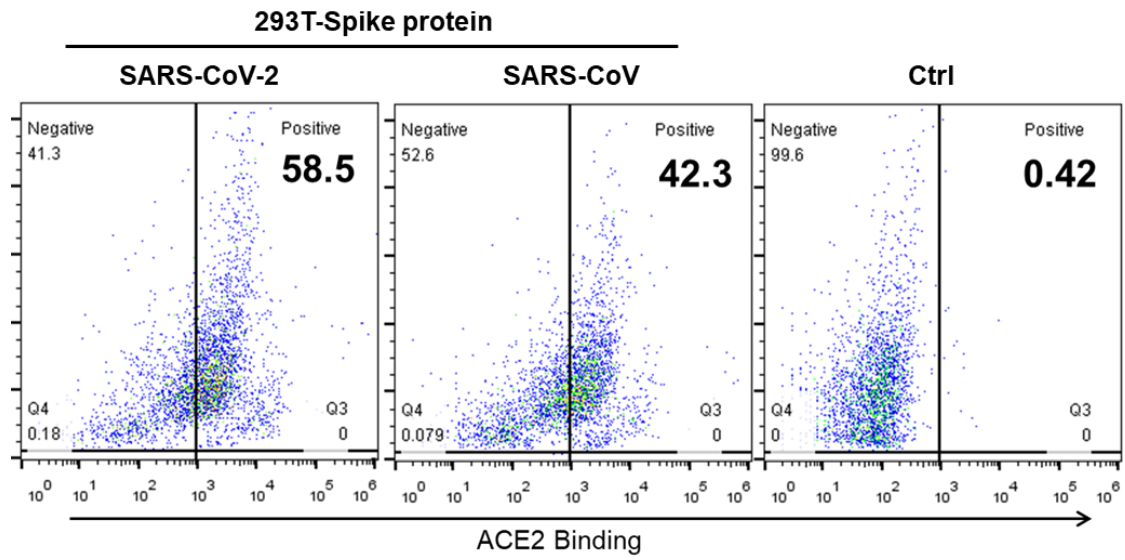

**Figure S4. Related to Figure 4**

ACE2 binding to S proteins of SARS-CoV-2 and SARS-CoV expressed on HEK293T membrane.

Non-transfected HEK293T were used as controls.

## Figure S5

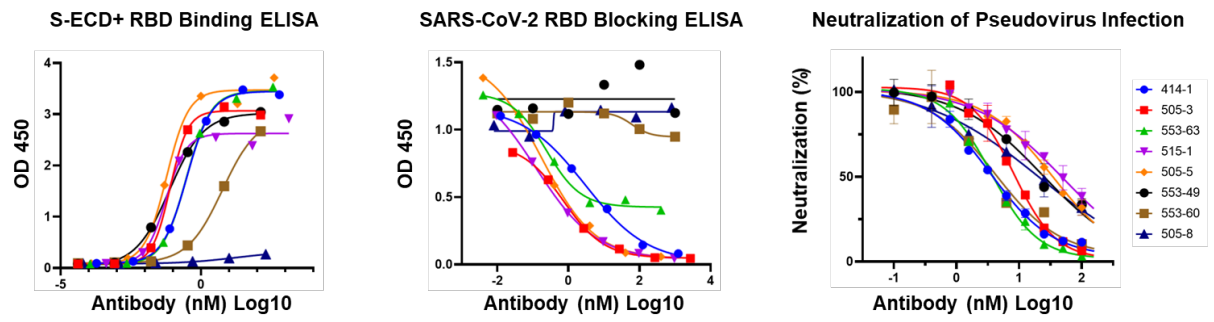

Figure S5. Related to Figure 3

Performance of the indicated neutralizing antibodies in the various assays.
